# Supplementary material for: HD DVD substrates for surface enhanced Raman spectroscopy analysis: fabrication, theoretical predictions and practical performance
Source: Royal Society of Chemistry journal article supplement (doi:10.1039/c6ra06029c), 2016-01-01
Supplement: c6ra06029c1.pdf [file c6ra06029c1.pdf]

# HD DVD substrates for Surface Enhanced Raman Spectroscopy Analysis: Fabrication, Theoretical Predictions and Practical Performance

*Andreea - Ioana Radu,<sup>a,b,§</sup> Yera Ye. Ussembayev,<sup>c,d,e,§,†</sup> Martin Jahn,<sup>a,b</sup>, Ulrich S. Schubert,<sup>c,d</sup> Karina Weber,<sup>a,b</sup> Dana Cialla-May,<sup>a,b,\*</sup> Stephanie Hoepfener,<sup>c,d,\*</sup> Alexander Heisterkamp<sup>e</sup> and Jürgen Popp<sup>a,b</sup>*

<sup>a</sup> Friedrich Schiller University Jena, Institute of Physical Chemistry and Abbe Center of Photonics, Helmholtzweg 4, 07745 Jena, Germany.

<sup>b</sup> Leibniz Institute of Photonic Technology Jena, Albert-Einstein-Str. 9, 07745 Jena, Germany.

<sup>c</sup> Laboratory of Organic and Macromolecular Chemistry (IOMC), Friedrich Schiller University Jena, Humboldtstr. 10, 07743 Jena, Germany.

<sup>d</sup> Jena Center for Soft Matter (JCSM), Friedrich Schiller University Jena, Philosophenweg 7, 07743 Jena, Germany.

<sup>e</sup> Institute of Applied Optics, Fröbelstieg 1, 07743 Jena, Germany.

<sup>§</sup> Both authors contributed equally to the studies.

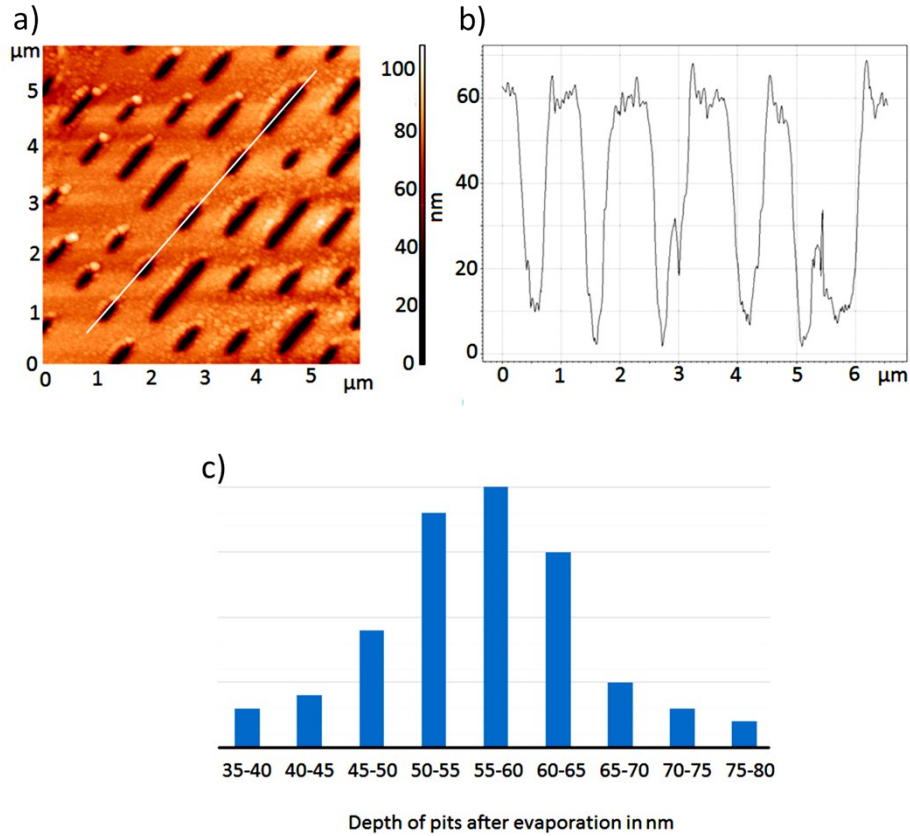

**Figure S11** – Evaluation of the depth of the encoding pits after evaporation of a 30 nm gold layer. a) 2D representation of the encoding pit structure. b) Extracted line profile along the line highlighted in a). c) Histogramm of the measured depth of encoding pits.

The average pit depth is  $55 \text{ nm} \pm 9 \text{ nm}$  (standard deviation). For the calculations an average depth of 60 nm was assumed. This is in line with the estimations made for assumed encoding pit lengths.

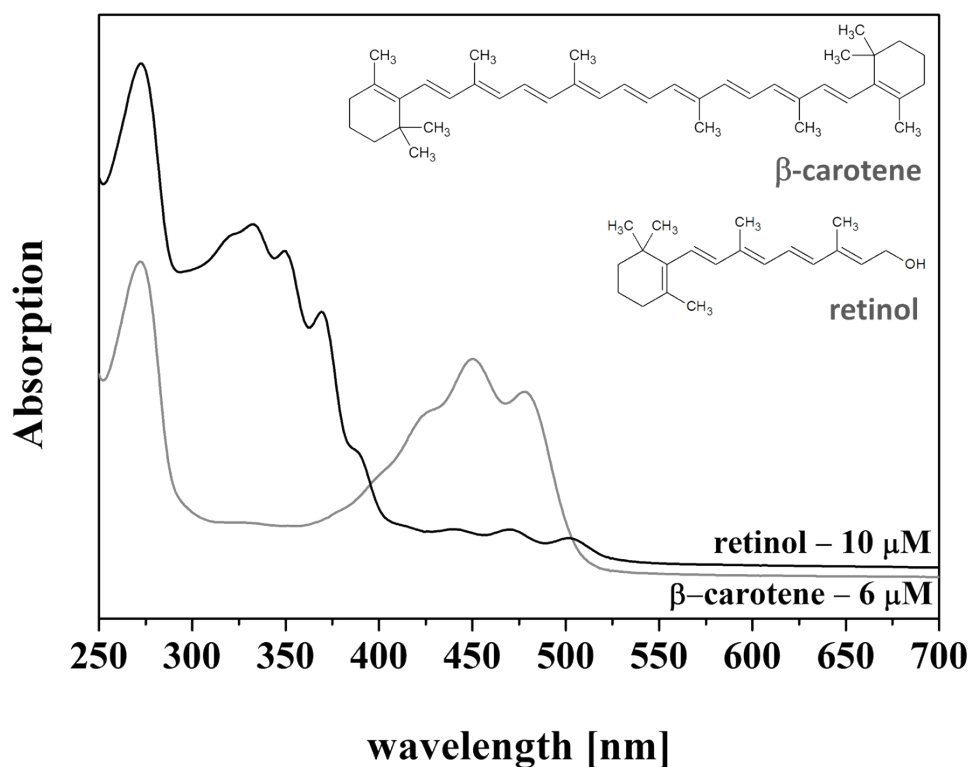

**Figure S12** – Absorption spectra of retinol and  $\beta$ -carotene and schematic representation of the chemical structure of retinol and  $\beta$ -carotene.

The analytes  $\beta$ -carotene and retinol show a strong absorption in the UV and VIS spectral range. This behavior has been widely discussed and explained by considering their chemical structures. More exactly,  $\beta$ -carotene is characterized by a conjugated  $\pi$ -system with 9 double bonds in its hydrocarbon backbone while retinol has just 4 such repeating units.<sup>51, 52</sup> Since the Raman and SERS measurements were performed applying 785 nm as excitation wavelength, no additional resonance Raman contribution to the overall Raman spectrum is expected.
